# Supplementary material for: Channelized Substrates Made from BaZr0.75Ce0.05Y0.2O3−d Proton-Conducting Ceramic Polymer Clay
Source: Membranes (Basel). 2019 Oct 9;9(10):130. doi: 10.3390/membranes9100130 (PMC6836173; doi:10.3390/membranes9100130)
Supplement: Supplementary file 1 [file membranes-09-00130-s001.pdf]

## Supplementary Materials: Channelized Substrates Made from $\text{BaZr}_{0.75}\text{Ce}_{0.05}\text{Y}_{0.2}\text{O}_{3-d}$ Proton-Conducting Ceramic Polymer Clay

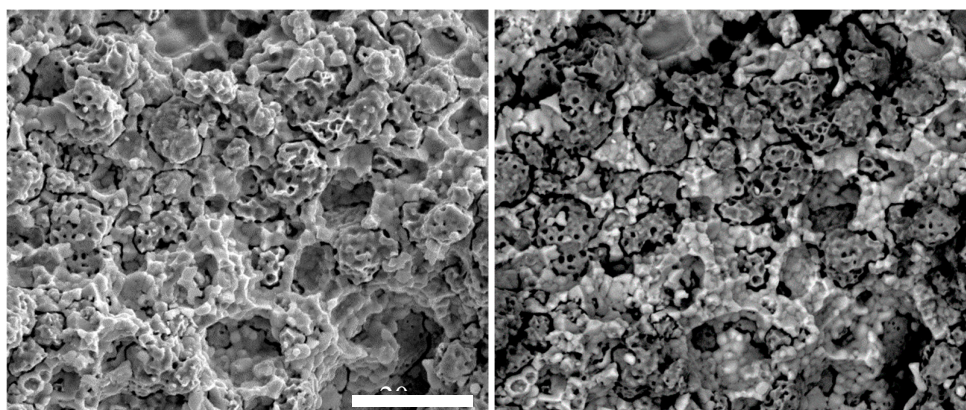

**Figure S1.** Secondary electron (left) and back-scattered electron (right) micrographs of the BZCY755/Ni electrode in a sintered and reduced BZCY755/Ni//BZCY755//BZCY755/Ni fractured cross section. The sample was reduced at 700 °C. (BZCY755: light phase, Ni: grey phase).
